# Supplementary material for: COVID-19 relevant genetic variants confirmed in an admixed population
Source: bioRxiv or medRxiv preprint supplement (doi:10.1101/2022.04.15.22273925), 2022-04-16
Supplement: Supplementary file [file media-1.pdf]

| SNP                | MAFNonCovid | MAF COVID | N COVID | p-value-MAF |
|--------------------|-------------|-----------|---------|-------------|
| rs56390333         | 0           | 0.07547   | 101     | 2.47E-103   |
| <b>rs35494115</b>  | 0.000487    | 0.08019   | 103     | 1.86E-92    |
| <b>rs371569951</b> | 0.000487    | 0.06132   | 104     | 8.44E-68    |
| <b>rs200932155</b> | 0.000974    | 0.06604   | 106     | 3.07E-62    |
| <b>rs113318190</b> | 0.000162    | 0.1085    | 95      | 2.30E-141   |
| <b>rs72977997</b>  | 0.003085    | 0.09906   | 98      | 9.38E-68    |
| <b>rs118149076</b> | 0.000812    | 0.07075   | 104     | 1.23E-71    |
| rs200040076        | 0           | 0.1321    | 95      | 1.14E-179   |
| <b>rs181118021</b> | 0.000162    | 0.09906   | 98      | 1.15E-128   |
| <b>rs16942374</b>  | 0.000162    | 0.06604   | 101     | 2.54E-84    |
| <b>rs2072134</b>   | 0.000974    | 0.09434   | 98      | 1.40E-97    |
| rs7466899          | 0.000974    | 0.03302   | 106     | 2.84E-24    |
| rs8176739          | 0.005196    | 0.07075   | 103     | 5.53E-28    |
| rs1053878          | 0.03654     | 0.2028    | 98      | 1.95E-32    |
| rs8176716          | 0.007957    | 0.1179    | 99      | 7.28E-49    |
| rs9411372          | 0.00065     | 0.03774   | 104     | 1.81E-34    |
| rs8176705          | 0.004547    | 0.07075   | 101     | 5.50E-31    |
| rs61736301         | 0.000162    | 0.0283    | 105     | 5.14E-34    |
| rs543040           | 0.2335      | 0.5708    | 57      | 2.93E-29    |
| rs613534           | 0.2442      | 0.5708    | 56      | 7.93E-27    |
| rs544873           | 0.2442      | 0.566     | 56      | 4.09E-26    |
| rs545971           | 0.2335      | 0.5519    | 59      | 2.67E-26    |
| rs612169           | 0.2335      | 0.5519    | 59      | 2.67E-26    |
| rs597988           | 0.2332      | 0.5519    | 59      | 2.26E-26    |
| rs597974           | 0.2332      | 0.5519    | 59      | 2.26E-26    |
| rs576123           | 0.2332      | 0.5519    | 59      | 2.26E-26    |
| rs8176663          | 0.2335      | 0.5519    | 59      | 2.67E-26    |
| rs491626           | 0.2332      | 0.5425    | 60      | 5.99E-25    |
| rs492488           | 0.2332      | 0.5425    | 60      | 5.99E-25    |
| rs493246           | 0.2332      | 0.5425    | 60      | 5.99E-25    |
| rs494242           | 0.2439      | 0.5519    | 58      | 4.21E-24    |
| rs495203           | 0.2332      | 0.5425    | 60      | 5.99E-25    |
| rs582118           | 0.2161      | 0.5142    | 65      | 1.99E-24    |
| rs582094           | 0.217       | 0.5425    | 62      | 1.12E-28    |
| rs79006711         | 0.0302      | 0.1981    | 90      | 2.70E-38    |
| rs41289608         | 0.03313     | 0.2264    | 88      | 9.74E-46    |
| rs6775854          | 0.03556     | 0.2028    | 92      | 1.76E-33    |
| rs7648467          | 0.03556     | 0.2028    | 92      | 1.76E-33    |
| rs17078408         | 0.03573     | 0.2028    | 92      | 2.65E-33    |
| rs75192040         | 0.03621     | 0.1792    | 95      | 5.17E-25    |
| rs113305890        | 0.02273     | 0.1321    | 96      | 1.54E-22    |
| rs73539528         | 0.02192     | 0.1321    | 96      | 1.74E-23    |
| rs75894880         | 0.01786     | 0.1321    | 96      | 2.87E-29    |
| rs57034092         | 0.02209     | 0.1321    | 96      | 2.73E-23    |
| rs74840661         | 0.01007     | 0.09434   | 99      | 9.93E-27    |

|             |          |         |     |          |
|-------------|----------|---------|-----|----------|
| rs78788550  | 0.01056  | 0.09434 | 99  | 1.41E-25 |
| rs16992502  | 0.01185  | 0.09434 | 99  | 7.20E-23 |
| rs79945697  | 0.01056  | 0.09906 | 99  | 4.85E-28 |
| rs75191837  | 0.002273 | 0.07547 | 102 | 7.01E-53 |
| rs114625537 | 0.01056  | 0.09434 | 100 | 1.41E-25 |
| rs60431156  | 0.01559  | 0.1038  | 102 | 7.78E-21 |
| rs564601460 | 0.001949 | 0.04245 | 106 | 4.71E-24 |
| rs146554934 | 0.002111 | 0.04245 | 106 | 7.26E-23 |
| rs114548859 | 0.002111 | 0.04245 | 106 | 7.26E-23 |
| rs141155944 | 0.001949 | 0.04245 | 106 | 4.71E-24 |
| rs150785981 | 0.001949 | 0.04245 | 106 | 4.71E-24 |
| rs140002692 | 0.000812 | 0.03774 | 104 | 1.09E-31 |
| rs77896301  | 0.002111 | 0.04245 | 106 | 7.26E-23 |
| rs75726990  | 0.002111 | 0.04245 | 106 | 7.26E-23 |
| rs145828326 | 0.000812 | 0.03774 | 104 | 1.09E-31 |
| rs181518477 | 0.001949 | 0.04245 | 106 | 4.71E-24 |
| rs140228956 | 0.001949 | 0.04245 | 106 | 4.71E-24 |
| rs189847748 | 0.001949 | 0.04245 | 106 | 4.71E-24 |
| rs141064206 | 0        | 0.02358 | 106 | 1.80E-33 |
| rs141476300 | 0        | 0.02358 | 106 | 1.80E-33 |
| rs7619256   | 0.03264  | 0.1934  | 92  | 2.24E-33 |
| rs3947589   | 0.06772  | 0.2406  | 90  | 2.44E-21 |
| rs144511372 | 0        | 0.0283  | 106 | 7.91E-40 |
| rs61732395  | 0.001462 | 0.03774 | 105 | 7.84E-24 |
| rs184655598 | 0        | 0.03302 | 105 | 3.50E-46 |
| rs35018800  | 0.002761 | 0.06132 | 102 | 1.79E-34 |
| rs55882956  | 0.0203   | 0.1415  | 97  | 2.02E-29 |
| rs569981396 | 0        | 0.00472 | 106 | 7.05E-08 |
| rs10901251  | 0.1431   | 0.3208  | 88  | 9.06E-13 |
| rs34266669  | 0.05278  | 0.1274  | 99  | 2.97E-06 |
| rs199969472 | 0.05278  | 0.1274  | 99  | 2.97E-06 |
| rs35184739  | 0.05261  | 0.1274  | 99  | 2.74E-06 |
| rs7849280   | 0.05294  | 0.1274  | 99  | 3.22E-06 |
| rs9411475   | 0.04449  | 0.1179  | 99  | 6.69E-07 |
| rs13291798  | 0.0354   | 0.1085  | 100 | 4.15E-08 |
| rs34085694  | 0.06073  | 0.1792  | 100 | 5.28E-12 |
| rs4962113   | 0.4209   | 0.3349  | 89  | 1.26E-02 |
| rs111590440 | 0.01104  | 0.0283  | 106 | 2.11E-02 |
| rs73660468  | 0.008282 | 0.04717 | 106 | 1.09E-08 |
| rs7870156   | 0.01023  | 0.04245 | 106 | 1.28E-05 |
| rs62574565  | 0.4638   | 0.5613  | 66  | 5.13E-03 |
| rs58081338  | 0.4729   | 0.6274  | 59  | 9.54E-06 |
| rs62574567  | 0.4729   | 0.6274  | 59  | 9.54E-06 |
| rs60484807  | 0.4688   | 0.3255  | 91  | 3.87E-05 |
| rs12554580  | 0.4688   | 0.3302  | 90  | 6.91E-05 |
| rs12554336  | 0.4726   | 0.6274  | 59  | 9.14E-06 |

|             |          |          |     |          |
|-------------|----------|----------|-----|----------|
| rs12554339  | 0.4657   | 0.5755   | 66  | 1.65E-03 |
| rs10901253  | 0.4726   | 0.6274   | 59  | 9.14E-06 |
| rs10751502  | 0.4657   | 0.3208   | 92  | 3.13E-05 |
| rs11244052  | 0.4657   | 0.5755   | 66  | 1.65E-03 |
| rs11244053  | 0.4726   | 0.6274   | 59  | 9.14E-06 |
| rs4962114   | 0.4726   | 0.6274   | 59  | 9.14E-06 |
| rs4962115   | 0.4726   | 0.6274   | 59  | 9.14E-06 |
| rs4962116   | 0.4726   | 0.6274   | 59  | 9.14E-06 |
| rs8176757   | 0.4696   | 0.3302   | 90  | 6.27E-05 |
| rs111207633 | 0.00682  | 0.0283   | 106 | 3.76E-04 |
| rs11244054  | 0.3157   | 0.2264   | 99  | 5.84E-03 |
| rs530909128 | 0.000325 | 0.004717 | 106 | 3.75E-03 |
| rs7469795   | 0.4701   | 0.3255   | 91  | 3.30E-05 |
| rs7466519   | 0.00682  | 0.0283   | 106 | 3.76E-04 |
| rs8176748   | 0.4657   | 0.5802   | 66  | 1.03E-03 |
| rs8176745   | 0.4662   | 0.5802   | 66  | 1.08E-03 |
| rs201439325 | 0.000487 | 0.004717 | 106 | 1.56E-02 |
| rs56116432  | 0.00065  | 0.004717 | 106 | 3.76E-02 |
| rs557530257 | 0        | 0.00472  | 106 | 7.05E-08 |
| rs7855255   | 0.06642  | 0.1085   | 102 | 1.66E-02 |
| rs8176735   | 0.04027  | 0.009434 | 106 | 2.30E-02 |
| rs8176733   | 0.06642  | 0.1085   | 102 | 1.66E-02 |
| rs2073823   | 0.06642  | 0.1085   | 102 | 1.66E-02 |
| rs8176730   | 0.06642  | 0.1085   | 102 | 1.66E-02 |
| rs8176729   | 0.04027  | 0.009434 | 106 | 2.30E-02 |
| rs8176725   | 0.0669   | 0.1085   | 102 | 1.83E-02 |
| rs111310794 | 0.06155  | 0.01415  | 106 | 4.27E-03 |
| rs45610939  | 0.009256 | 0.02358  | 105 | 3.67E-02 |
| rs4962040   | 0.2092   | 0.1509   | 99  | 3.98E-02 |
| rs138164693 | 0.008769 | 0.02358  | 105 | 2.68E-02 |
| rs8176710   | 0.0669   | 0.01415  | 106 | 2.21E-03 |
| rs183228393 | 0.008769 | 0.02358  | 105 | 2.68E-02 |
| rs8176702   | 0.2082   | 0.1321   | 100 | 7.02E-03 |
| rs8176698   | 0.00406  | 0.01415  | 106 | 2.90E-02 |
| rs8176696   | 0.00406  | 0.01415  | 106 | 2.90E-02 |
| rs687621    | 0.233    | 0.3019   | 86  | 2.01E-02 |
| rs687289    | 0.2319   | 0.3019   | 86  | 1.80E-02 |
| rs150372066 | 0.00341  | 0.0283   | 106 | 4.13E-08 |
| rs143174772 | 0.009419 | 0.06604  | 103 | 1.75E-14 |
| rs151155628 | 0.009419 | 0.06604  | 103 | 1.75E-14 |
| rs8176694   | 0.2186   | 0.1368   | 104 | 4.43E-03 |
| rs150326069 | 0.000162 | 0.004717 | 106 | 2.33E-04 |
| rs8176692   | 0.01072  | 0.06604  | 103 | 1.15E-12 |
| rs145090216 | 0.009419 | 0.06604  | 103 | 1.75E-14 |
| rs8176691   | 0.2134   | 0.1415   | 101 | 1.17E-02 |
| rs8176687   | 0.06479  | 0.01415  | 106 | 2.87E-03 |

|             |          |          |     |          |
|-------------|----------|----------|-----|----------|
| rs8176684   | 0.007957 | 0.04717  | 106 | 4.62E-09 |
| rs147279040 | 0.0112   | 0.0566   | 103 | 6.61E-09 |
| rs657152    | 0.2436   | 0.3632   | 82  | 7.25E-05 |
| rs8176682   | 0.2135   | 0.1274   | 102 | 2.48E-03 |
| rs139568229 | 0.01072  | 0.0566   | 103 | 2.33E-09 |
| rs149756392 | 0.01072  | 0.0566   | 103 | 2.33E-09 |
| rs145595975 | 0.01072  | 0.0566   | 103 | 2.33E-09 |
| rs148824570 | 0.01072  | 0.0566   | 103 | 2.33E-09 |
| rs146458069 | 0.01072  | 0.0566   | 103 | 2.33E-09 |
| rs181170522 | 0        | 0.00472  | 106 | 7.05E-08 |
| rs141515001 | 0.01072  | 0.0566   | 103 | 2.33E-09 |
| rs8176679   | 0.06479  | 0.01415  | 106 | 2.87E-03 |
| rs587736740 | 0.01072  | 0.05189  | 103 | 6.92E-08 |
| rs138313692 | 0.000325 | 0.01415  | 106 | 1.58E-12 |
| rs149567216 | 0.01072  | 0.0566   | 103 | 2.33E-09 |
| rs8176676   | 0.000162 | 0.009434 | 106 | 9.50E-10 |
| rs143159728 | 0.01072  | 0.0566   | 103 | 2.33E-09 |
| rs587682147 | 0.01072  | 0.05189  | 103 | 6.92E-08 |
| rs587774481 | 0.01072  | 0.05189  | 103 | 6.92E-08 |
| rs587635767 | 0.01056  | 0.03774  | 104 | 2.56E-04 |
| rs1752339   | 0.4602   | 0.5425   | 66  | 1.82E-02 |
| rs148667000 | 0.000325 | 0.01415  | 106 | 1.58E-12 |
| rs142141716 | 0.01072  | 0.05189  | 103 | 6.92E-08 |
| rs587716454 | 0.01072  | 0.05189  | 103 | 6.92E-08 |
| rs587682443 | 0.001949 | 0.01887  | 106 | 1.31E-06 |
| rs587764387 | 0.001949 | 0.01887  | 106 | 1.31E-06 |
| rs587637585 | 0.001949 | 0.01887  | 106 | 1.31E-06 |
| rs144140881 | 0.01072  | 0.05189  | 103 | 6.92E-08 |
| rs1927315   | 0.4602   | 0.5425   | 66  | 1.82E-02 |
| rs514659    | 0.2335   | 0.3679   | 83  | 6.23E-06 |
| rs644234    | 0.2442   | 0.4292   | 75  | 9.75E-10 |
| rs140796254 | 0.01072  | 0.05189  | 103 | 6.92E-08 |
| rs143309559 | 0.01072  | 0.05189  | 103 | 6.92E-08 |
| rs643434    | 0.2442   | 0.4292   | 75  | 9.75E-10 |
| rs145489959 | 0.000325 | 0.01415  | 106 | 1.58E-12 |
| rs587698906 | 0.000487 | 0.004717 | 106 | 1.56E-02 |
| rs139081859 | 0.000325 | 0.01415  | 106 | 1.58E-12 |
| rs142956930 | 0.006983 | 0.03302  | 106 | 2.40E-05 |
| rs8176668   | 0.2278   | 0.07547  | 104 | 1.59E-07 |
| rs574311    | 0.4615   | 0.6415   | 52  | 2.41E-07 |
| rs587663040 | 0        | 0.00472  | 106 | 7.05E-08 |
| rs488775    | 0.4588   | 0.6415   | 52  | 1.56E-07 |
| rs7036642   | 0.2116   | 0.07547  | 104 | 1.51E-06 |
| rs8176661   | 0.00747  | 0.05189  | 106 | 1.46E-11 |
| rs596141    | 0.4682   | 0.3538   | 83  | 1.02E-03 |
| rs587763606 | 0.000487 | 0.004717 | 106 | 1.56E-02 |

|             |          |          |     |          |
|-------------|----------|----------|-----|----------|
| rs587707823 | 0.1853   | 0.3962   | 81  | 1.83E-14 |
| rs34357864  | 0.2334   | 0.4245   | 79  | 1.45E-10 |
| rs2769071   | 0.2321   | 0.4292   | 79  | 3.52E-11 |
| rs7041458   | 0.00747  | 0.05189  | 106 | 1.46E-11 |
| rs677355    | 0.2321   | 0.4198   | 80  | 2.81E-10 |
| rs676457    | 0.2317   | 0.4151   | 81  | 7.03E-10 |
| rs79343853  | 0.05083  | 0.01415  | 106 | 1.56E-02 |
| rs527210    | 0.2314   | 0.4009   | 82  | 1.15E-08 |
| rs675201    | 0.4547   | 0.5472   | 67  | 7.88E-03 |
| rs550057    | 0.1652   | 0.283    | 90  | 6.73E-06 |
| rs674302    | 0.2332   | 0.4057   | 81  | 7.04E-09 |
| rs551100    | 0.4562   | 0.5519   | 66  | 5.96E-03 |
| rs663054    | 0.4454   | 0.5425   | 68  | 5.23E-03 |
| rs7046674   | 0.2119   | 0.1226   | 102 | 1.67E-03 |
| rs554833    | 0.2324   | 0.4057   | 81  | 5.75E-09 |
| rs8176649   | 0.209    | 0.1226   | 102 | 2.24E-03 |
| rs660340    | 0.2777   | 0.4575   | 75  | 1.12E-08 |
| rs581107    | 0.2778   | 0.4575   | 75  | 1.16E-08 |
| rs8176647   | 0.06138  | 0.009434 | 106 | 1.69E-03 |
| rs659104    | 0.2775   | 0.4151   | 75  | 1.21E-05 |
| rs647800    | 0.2882   | 0.4151   | 75  | 6.55E-05 |
| rs473533    | 0.2775   | 0.4151   | 75  | 1.21E-05 |
| rs147960974 | 0.000162 | 0.004717 | 106 | 2.33E-04 |
| rs475419    | 0.2766   | 0.4104   | 76  | 2.02E-05 |
| rs476410    | 0.2775   | 0.4151   | 75  | 1.21E-05 |
| rs645982    | 0.2775   | 0.4151   | 75  | 1.21E-05 |
| rs500498    | 0.2775   | 0.4151   | 75  | 1.21E-05 |
| rs145218729 | 0.000162 | 0.004717 | 106 | 2.33E-04 |
| rs8176644   | 0.04953  | 0.01415  | 106 | 1.82E-02 |
| rs505922    | 0.2283   | 0.3302   | 82  | 5.48E-04 |
| rs507666    | 0.1374   | 0.2453   | 88  | 9.04E-06 |
| rs529565    | 0.229    | 0.3349   | 81  | 3.31E-04 |
| rs8176641   | 0.05992  | 0.009434 | 106 | 2.03E-03 |
| rs532436    | 0.1811   | 0.2406   | 90  | 2.76E-02 |
| rs8176639   | 0.05992  | 0.009434 | 106 | 2.03E-03 |
| rs8176760   | 0.000325 | 0.009434 | 106 | 1.93E-07 |
| rs3749461   | 0.02842  | 0.1179   | 95  | 2.02E-13 |
| rs3918362   | 0.02842  | 0.1179   | 95  | 2.02E-13 |
| rs3092963   | 0.2892   | 0.4198   | 81  | 4.04E-05 |
| rs3918365   | 0.02842  | 0.1179   | 95  | 2.02E-13 |
| rs1799865   | 0.2892   | 0.4198   | 81  | 4.04E-05 |
| rs3138042   | 0.2892   | 0.4198   | 81  | 4.04E-05 |
| rs140253702 | 0.000325 | 0.004717 | 106 | 3.75E-03 |
| rs1860264   | 0.2621   | 0.4528   | 77  | 7.20E-10 |
| rs186153536 | 0.000325 | 0.004717 | 106 | 3.75E-03 |
| rs74808020  | 0.0354   | 0.08491  | 102 | 1.75E-04 |
| rs530595037 | 0.000325 | 0.004717 | 106 | 3.75E-03 |

|             |          |          |     |          |
|-------------|----------|----------|-----|----------|
| rs552329766 | 0.000325 | 0.004717 | 106 | 3.75E-03 |
| rs12631321  | 0.0354   | 0.08491  | 102 | 1.75E-04 |
| rs150667470 | 0.000487 | 0.004717 | 106 | 1.56E-02 |
| rs6441930   | 0.2621   | 0.4528   | 77  | 7.20E-10 |
| rs138421181 | 0        | 0.00472  | 106 | 7.05E-08 |
| rs115004584 | 0.000325 | 0.004717 | 106 | 3.75E-03 |
| rs78414305  | 0.000325 | 0.004717 | 106 | 3.75E-03 |
| rs115826613 | 0        | 0.00472  | 106 | 7.05E-08 |
| rs74739895  | 0.000325 | 0.004717 | 106 | 3.75E-03 |
| rs75018424  | 0.03524  | 0.08491  | 102 | 1.62E-04 |
| rs78044818  | 0.000325 | 0.004717 | 106 | 3.75E-03 |
| rs74337052  | 0        | 0.00472  | 106 | 7.05E-08 |
| rs7636844   | 0.1406   | 0.08491  | 106 | 2.10E-02 |
| rs2286486   | 0.1406   | 0.08019  | 106 | 1.23E-02 |
| rs116350857 | 0        | 0.00472  | 106 | 7.05E-08 |
| rs6441931   | 0.1406   | 0.08491  | 106 | 2.10E-02 |
| rs34338823  | 0.04141  | 0.01415  | 106 | 4.78E-02 |
| rs115227401 | 0.000325 | 0.004717 | 106 | 3.75E-03 |
| rs76478208  | 0.000325 | 0.004717 | 106 | 3.75E-03 |
| rs6783694   | 0.000325 | 0.004717 | 106 | 3.75E-03 |
| rs6441932   | 0.272    | 0.4481   | 77  | 1.82E-08 |
| rs116264461 | 0.000325 | 0.004717 | 106 | 3.75E-03 |
| rs77676459  | 0.000325 | 0.004717 | 106 | 3.75E-03 |
| rs114406614 | 0        | 0.00472  | 106 | 7.05E-08 |
| rs144180015 | 0.000325 | 0.004717 | 106 | 3.75E-03 |
| rs9862611   | 0.2714   | 0.4481   | 77  | 1.58E-08 |
| rs71325091  | 0.04141  | 0.01415  | 106 | 4.78E-02 |
| rs6441933   | 0.272    | 0.4481   | 77  | 1.82E-08 |
| rs141167007 | 0        | 0.00472  | 106 | 7.05E-08 |
| rs57527954  | 0.272    | 0.4481   | 77  | 1.82E-08 |
| rs9834860   | 0.272    | 0.4481   | 77  | 1.82E-08 |
| rs116207980 | 0        | 0.00472  | 106 | 7.05E-08 |
| rs12638201  | 0.03037  | 0.07547  | 102 | 2.37E-04 |
| rs9869542   | 0.1507   | 0.08491  | 106 | 8.08E-03 |
| rs56058226  | 0.3823   | 0.3113   | 88  | 3.64E-02 |
| rs75078036  | 0.02939  | 0.07075  | 102 | 6.06E-04 |
| rs9855205   | 0.05213  | 0.009434 | 106 | 5.34E-03 |
| rs3764864   | 0.07373  | 0.03774  | 106 | 4.70E-02 |
| rs6782814   | 0.08672  | 0.2264   | 92  | 3.89E-12 |
| rs9823523   | 0.05602  | 0.02358  | 106 | 4.15E-02 |
| rs3774642   | 0.02923  | 0.07547  | 102 | 1.26E-04 |
| rs3774641   | 0.1172   | 0.05189  | 106 | 3.37E-03 |
| rs1488371   | 0.2761   | 0.4434   | 79  | 1.01E-07 |
| rs147753307 | 0.001624 | 0.01415  | 106 | 7.07E-05 |
| rs2236938   | 0.1159   | 0.25     | 92  | 3.70E-09 |
| rs17764980  | 0.04157  | 0.01415  | 106 | 4.69E-02 |

|            |          |          |     |          |
|------------|----------|----------|-----|----------|
| rs79663567 | 0        | 0.00472  | 106 | 7.05E-08 |
| rs73830609 | 0.002436 | 0.01415  | 106 | 1.58E-03 |
| rs17714101 | 0.04157  | 0.01415  | 106 | 4.69E-02 |
| rs1985356  | 0.1567   | 0.3538   | 85  | 2.29E-14 |
| rs1985463  | 0.207    | 0.3821   | 85  | 9.28E-10 |
| rs59817490 | 0.003897 | 0.01415  | 106 | 2.39E-02 |
| rs7614342  | 0.1565   | 0.3538   | 85  | 2.14E-14 |
| rs79587259 | 0.02907  | 0.07075  | 102 | 5.15E-04 |
| rs61751653 | 0.001786 | 0.009434 | 105 | 1.53E-02 |
| rs74718475 | 0        | 0.00472  | 106 | 7.05E-08 |
| rs73830610 | 0.003897 | 0.01415  | 106 | 2.39E-02 |
| rs17714228 | 0.04157  | 0.01415  | 106 | 4.69E-02 |
| rs875891   | 0.1554   | 0.3538   | 85  | 1.29E-14 |
| rs875890   | 0.2069   | 0.3821   | 85  | 8.86E-10 |
| rs62245098 | 0.1565   | 0.3585   | 84  | 5.20E-15 |
| rs28595837 | 0.02225  | 0.05189  | 102 | 4.85E-03 |
| rs9881306  | 0.05213  | 0.009434 | 106 | 5.34E-03 |
| rs28501674 | 0.1552   | 0.3538   | 85  | 1.20E-14 |
| rs61565453 | 0.1565   | 0.3585   | 84  | 5.20E-15 |
| rs71325092 | 0.04157  | 0.01415  | 106 | 4.69E-02 |
| rs79179998 | 0.05213  | 0.009434 | 106 | 5.34E-03 |
| rs57295094 | 0.1549   | 0.3538   | 85  | 1.03E-14 |
| rs6791859  | 0.1609   | 0.3443   | 86  | 1.93E-12 |
| rs4683147  | 0.3966   | 0.566    | 65  | 7.49E-07 |
| rs74945326 | 0.04108  | 0.009434 | 106 | 2.08E-02 |
| rs62245101 | 0.1146   | 0.2311   | 95  | 2.48E-07 |
| rs62245102 | 0.1593   | 0.3396   | 87  | 3.67E-12 |
| rs7638236  | 0.019    | 0.04245  | 105 | 1.59E-02 |
| rs4535265  | 0.4108   | 0.5094   | 71  | 4.17E-03 |
| rs9869848  | 0.1111   | 0.1887   | 93  | 4.65E-04 |
| rs9875616  | 0.109    | 0.1887   | 93  | 2.90E-04 |
| rs13091979 | 0.4105   | 0.5094   | 71  | 4.04E-03 |
| rs13091821 | 0.4105   | 0.5094   | 71  | 4.04E-03 |
| rs17078449 | 0.1471   | 0.08019  | 105 | 6.48E-03 |
| rs936938   | 0.4074   | 0.5      | 72  | 7.07E-03 |
| rs2171531  | 0.04579  | 0.009434 | 106 | 1.17E-02 |
| rs17078454 | 0.1466   | 0.08019  | 105 | 6.81E-03 |
| rs57204020 | 0.1465   | 0.08019  | 105 | 6.92E-03 |
| rs7634640  | 0.07616  | 0.1651   | 94  | 2.40E-06 |
| rs55920693 | 0.04579  | 0.009434 | 106 | 1.17E-02 |
| rs3774640  | 0.1465   | 0.08019  | 105 | 6.92E-03 |
| rs3774639  | 0.4105   | 0.5094   | 71  | 4.04E-03 |
| rs3774638  | 0.1465   | 0.08019  | 105 | 6.92E-03 |
| rs7627147  | 0.01851  | 0.04245  | 105 | 1.27E-02 |
| rs2234350  | 0.1259   | 0.1887   | 93  | 7.09E-03 |
| rs2234351  | 0.1462   | 0.08019  | 105 | 7.15E-03 |

|             |          |          |     |          |
|-------------|----------|----------|-----|----------|
| rs191811571 | 0.000162 | 0.004717 | 106 | 2.33E-04 |
| rs3774635   | 0.4074   | 0.5      | 72  | 7.07E-03 |
| rs936939    | 0.1465   | 0.08019  | 105 | 6.92E-03 |
| rs143980719 | 0.001949 | 0.01415  | 106 | 3.13E-04 |
| rs2234355   | 0.02533  | 0.06132  | 105 | 1.35E-03 |
| rs17078464  | 0.01835  | 0.04245  | 105 | 1.18E-02 |
| rs2054866   | 0.4074   | 0.5      | 72  | 7.07E-03 |
| rs58442576  | 0.01851  | 0.04245  | 105 | 1.27E-02 |
| rs4683156   | 0.4105   | 0.5094   | 71  | 4.04E-03 |
| rs56239523  | 0.01851  | 0.04245  | 105 | 1.27E-02 |
| rs58050797  | 0.01835  | 0.04245  | 105 | 1.18E-02 |
| rs1994488   | 0.4074   | 0.5      | 72  | 7.07E-03 |
| rs35501575  | 0.04596  | 0.009434 | 106 | 1.14E-02 |
| rs1552489   | 0.4074   | 0.5      | 72  | 7.07E-03 |
| rs8107316   | 0.2243   | 0.3066   | 88  | 4.89E-03 |
| rs72977966  | 0        | 0.00472  | 106 | 7.05E-08 |
| rs8105807   | 0.3037   | 0.3679   | 84  | 4.59E-02 |
| rs10421782  | 0.3027   | 0.3679   | 84  | 4.25E-02 |
| rs2885734   | 0.3037   | 0.3679   | 84  | 4.59E-02 |
| rs114346470 | 0.000162 | 0.004717 | 106 | 2.33E-04 |
| rs34136596  | 0.00065  | 0.004717 | 106 | 3.76E-02 |
| rs113439332 | 0.0328   | 0.1321   | 96  | 2.58E-14 |
| rs113094386 | 0.005684 | 0.01887  | 105 | 1.55E-02 |
| rs2277735   | 0.2947   | 0.3821   | 82  | 6.25E-03 |
| rs60199752  | 0.2241   | 0.3066   | 87  | 4.80E-03 |
| rs35408525  | 0.00065  | 0.004717 | 106 | 3.76E-02 |
| rs11671605  | 0.2241   | 0.3066   | 87  | 4.80E-03 |
| rs4401152   | 0.2244   | 0.3019   | 88  | 8.11E-03 |
| rs72977989  | 0.2241   | 0.3019   | 88  | 7.82E-03 |
| rs139518006 | 0.000162 | 0.004717 | 106 | 2.33E-04 |
| rs11670257  | 0.3514   | 0.5      | 75  | 8.93E-06 |
| rs2277733   | 0.3365   | 0.25     | 100 | 8.65E-03 |
| rs732631    | 0.2756   | 0.3396   | 89  | 4.06E-02 |
| rs2006231   | 0.4292   | 0.3443   | 97  | 1.40E-02 |
| rs2109069   | 0.2462   | 0.3208   | 89  | 1.35E-02 |
| rs2109070   | 0.2446   | 0.3208   | 89  | 1.14E-02 |
| rs3833278   | 0.3909   | 0.3208   | 88  | 3.94E-02 |
| rs1467941   | 0.3988   | 0.3255   | 88  | 3.18E-02 |
| rs1467942   | 0.404    | 0.3349   | 88  | 4.35E-02 |
| rs56945978  | 0.4256   | 0.3443   | 97  | 1.85E-02 |
| rs758510    | 0.3474   | 0.2783   | 91  | 3.76E-02 |
| rs2277732   | 0.1504   | 0.2925   | 89  | 1.92E-08 |
| rs10420007  | 0.3953   | 0.3208   | 88  | 2.90E-02 |
| rs10420225  | 0.4292   | 0.3443   | 97  | 1.40E-02 |
| rs530191556 | 0.3964   | 0.3255   | 88  | 3.77E-02 |
| rs4683148   | 0.4112   | 0.5377   | 70  | 2.36E-04 |



|             |          |          |     |          |
|-------------|----------|----------|-----|----------|
| rs2171530   | 0.2196   | 0.316    | 92  | 9.01E-04 |
| rs9831315   | 0.4055   | 0.5283   | 72  | 3.50E-04 |
| rs560966886 | 0.000162 | 0.004717 | 106 | 2.33E-04 |
| rs72622922  | 0.000325 | 0.01415  | 106 | 1.58E-12 |
| rs185588322 | 0.001624 | 0.01415  | 106 | 7.07E-05 |
| rs7129      | 0.4058   | 0.5283   | 72  | 3.63E-04 |
| rs1994492   | 0.04222  | 0.009434 | 106 | 1.81E-02 |
| rs1994493   | 0.04222  | 0.009434 | 106 | 1.81E-02 |
| rs3796373   | 0.2212   | 0.3208   | 91  | 6.34E-04 |
| rs3733103   | 0.4112   | 0.533    | 71  | 4.00E-04 |
| rs75928798  | 0.04206  | 0.009434 | 106 | 1.85E-02 |
| rs2291470   | 0.4057   | 0.5283   | 72  | 3.56E-04 |
| rs11130078  | 0.2204   | 0.3349   | 84  | 8.43E-05 |
| rs148655132 | 0.001624 | 0.01415  | 106 | 7.07E-05 |
| rs11707672  | 0.0112   | 0.04245  | 104 | 4.75E-05 |
| rs6800954   | 0.1502   | 0.09906  | 104 | 3.95E-02 |
| rs140100519 | 0.001624 | 0.01415  | 106 | 7.07E-05 |
| rs2248228   | 0.4094   | 0.5094   | 71  | 3.62E-03 |
| rs60237998  | 0.1512   | 0.08962  | 104 | 1.34E-02 |
| rs60110056  | 0.01543  | 0.04245  | 105 | 2.27E-03 |
| rs58491168  | 0.019    | 0.04245  | 105 | 1.59E-02 |
| rs4683149   | 0.4052   | 0.5047   | 71  | 3.74E-03 |
| rs2373087   | 0.04417  | 0.009434 | 106 | 1.43E-02 |
| rs7631809   | 0.1504   | 0.08962  | 104 | 1.44E-02 |
| rs2373088   | 0.06414  | 0.1557   | 94  | 1.67E-07 |
| rs62245106  | 0.113    | 0.0566   | 105 | 1.02E-02 |
| rs12638598  | 0.207    | 0.1132   | 103 | 8.55E-04 |
| rs35831747  | 0.04417  | 0.009434 | 106 | 1.43E-02 |
| rs77709797  | 0.1166   | 0.0566   | 105 | 7.01E-03 |
| rs1532070   | 0.06431  | 0.1557   | 94  | 1.81E-07 |
| rs6778225   | 0.1484   | 0.08491  | 105 | 1.01E-02 |
| rs13099120  | 0.04417  | 0.009434 | 106 | 1.43E-02 |
| rs6778324   | 0.1483   | 0.08491  | 105 | 1.02E-02 |
| rs60779624  | 0.1484   | 0.08491  | 105 | 1.01E-02 |
| rs190039371 | 0.1166   | 0.0566   | 105 | 7.01E-03 |
| rs41289614  | 0.03459  | 0.009434 | 106 | 4.61E-02 |
| rs35477280  | 0.04417  | 0.009434 | 106 | 1.43E-02 |
| rs4683152   | 0.4094   | 0.5094   | 71  | 3.62E-03 |
| rs13066516  | 0.04417  | 0.009434 | 106 | 1.43E-02 |
| rs200582580 | 0.04401  | 0.009434 | 106 | 1.45E-02 |
| rs1072755   | 0.4055   | 0.5      | 72  | 5.92E-03 |
| rs77902290  | 0.04417  | 0.009434 | 106 | 1.43E-02 |
| rs532777636 | 0.04579  | 0.009434 | 106 | 1.17E-02 |
| rs62242787  | 0.1543   | 0.07547  | 105 | 1.66E-03 |
| rs17078471  | 0.002111 | 0.009434 | 106 | 3.06E-02 |
| rs35257780  | 0.04628  | 0.009434 | 106 | 1.10E-02 |
| rs34000569  | 0.04628  | 0.009434 | 106 | 1.10E-02 |

|             |          |          |     |          |
|-------------|----------|----------|-----|----------|
| rs34324101  | 0.04628  | 0.009434 | 106 | 1.10E-02 |
| rs13069079  | 0.04628  | 0.009434 | 106 | 1.10E-02 |
| rs34849862  | 0.04628  | 0.009434 | 106 | 1.10E-02 |
| rs62242788  | 0.1263   | 0.0566   | 105 | 2.46E-03 |
| rs35209528  | 0.04628  | 0.009434 | 106 | 1.10E-02 |
| rs75918913  | 0.03995  | 0.009434 | 106 | 2.39E-02 |
| rs57036895  | 0.01543  | 0.03774  | 106 | 1.13E-02 |
| rs13079869  | 0.04677  | 0.009434 | 106 | 1.04E-02 |
| rs33910087  | 0.04693  | 0.009434 | 106 | 1.01E-02 |
| rs3796376   | 0.1354   | 0.0566   | 105 | 8.83E-04 |
| rs17215008  | 0.04644  | 0.009434 | 106 | 1.08E-02 |
| rs71325098  | 0.04644  | 0.009434 | 106 | 1.08E-02 |
| rs71325100  | 0.04644  | 0.009434 | 106 | 1.08E-02 |
| rs41289622  | 0.04644  | 0.009434 | 106 | 1.08E-02 |
| rs11130081  | 0.002111 | 0.009434 | 106 | 3.06E-02 |
| rs12639598  | 0.405    | 0.5047   | 73  | 3.68E-03 |
| rs144873702 | 0.000812 | 0.01415  | 106 | 6.97E-08 |
| rs751552    | 0.4053   | 0.5142   | 72  | 1.53E-03 |
| rs751553    | 0.4053   | 0.5142   | 72  | 1.53E-03 |
| rs904634    | 0.08379  | 0.1604   | 96  | 9.48E-05 |
| rs13066062  | 0.04644  | 0.009434 | 106 | 1.08E-02 |
| rs6781668   | 0.1351   | 0.0566   | 105 | 9.17E-04 |
| rs9844821   | 0.07161  | 0.1509   | 101 | 1.48E-05 |
| rs57228214  | 0.02192  | 0.05189  | 106 | 4.15E-03 |
| rs9849771   | 0.09337  | 0.1604   | 96  | 1.11E-03 |
| rs9849818   | 0.08396  | 0.1604   | 96  | 9.94E-05 |
| rs4682801   | 0.1291   | 0.2547   | 88  | 1.22E-07 |
| rs35537559  | 0.1971   | 0.09434  | 105 | 1.96E-04 |
| rs59767267  | 0.1314   | 0.0566   | 105 | 1.40E-03 |
| rs3821883   | 0.1346   | 0.0566   | 105 | 9.69E-04 |
| rs36122610  | 0.04628  | 0.009434 | 106 | 1.10E-02 |
| rs138017682 | 0.00065  | 0.009434 | 106 | 4.14E-05 |
| rs34442130  | 0.04628  | 0.009434 | 106 | 1.10E-02 |
| rs931704    | 0.4039   | 0.4764   | 77  | 3.45E-02 |
| rs4683159   | 0.203    | 0.316    | 87  | 6.43E-05 |
| rs13075758  | 0.04628  | 0.009434 | 106 | 1.10E-02 |
| rs11130082  | 0.2035   | 0.3208   | 86  | 3.46E-05 |
| rs6802312   | 0.1159   | 0.2547   | 88  | 1.05E-09 |
| rs56972507  | 0.02144  | 0.04717  | 106 | 1.26E-02 |
| rs3733097   | 0.4058   | 0.5189   | 72  | 9.98E-04 |
| rs17078495  | 0.4058   | 0.5189   | 72  | 9.98E-04 |
| rs13086858  | 0.2035   | 0.3208   | 86  | 3.46E-05 |
| rs139886125 | 0.000812 | 0.01415  | 106 | 6.97E-08 |
| rs737452    | 0.4058   | 0.5189   | 72  | 9.98E-04 |
| rs730983    | 0.4039   | 0.4906   | 75  | 1.15E-02 |
| rs59226168  | 0.1898   | 0.1038   | 105 | 1.58E-03 |
| rs67044455  | 0.4058   | 0.533    | 70  | 2.14E-04 |

|             |          |          |     |          |
|-------------|----------|----------|-----|----------|
| rs62242796  | 0.1898   | 0.1038   | 105 | 1.58E-03 |
| rs7653682   | 0.1159   | 0.2877   | 86  | 5.35E-14 |
| rs72891712  | 0.02257  | 0.07547  | 104 | 8.88E-07 |
| rs1873000   | 0.203    | 0.3538   | 83  | 1.05E-07 |
| rs7628447   | 0.2035   | 0.3538   | 83  | 1.18E-07 |
| rs12635657  | 0.4057   | 0.5283   | 70  | 3.56E-04 |
| rs2133660   | 0.2371   | 0.3774   | 81  | 2.73E-06 |
| rs146216196 | 0.001786 | 0.01887  | 106 | 4.53E-07 |
| rs139044419 | 0.001786 | 0.01887  | 106 | 4.53E-07 |
| rs1846615   | 0.2371   | 0.3774   | 81  | 2.73E-06 |
| rs1873001   | 0.2371   | 0.3774   | 81  | 2.73E-06 |
| rs142154067 | 0.001786 | 0.01887  | 106 | 4.53E-07 |
| rs146285477 | 0.04628  | 0.009434 | 106 | 1.10E-02 |
| rs182171107 | 0.00065  | 0.009434 | 106 | 4.14E-05 |
| rs1500003   | 0.2371   | 0.3774   | 81  | 2.73E-06 |
| rs79067698  | 0.001786 | 0.01887  | 106 | 4.53E-07 |
| rs1392288   | 0.1673   | 0.3349   | 81  | 2.19E-10 |
| rs17330872  | 0.04628  | 0.009434 | 106 | 1.10E-02 |
| rs188114046 | 0.001786 | 0.01887  | 106 | 4.53E-07 |
| rs142571332 | 0.04579  | 0.009434 | 106 | 1.17E-02 |
| rs71327003  | 0.04612  | 0.009434 | 106 | 1.12E-02 |
| rs188401375 | 0.00065  | 0.004717 | 106 | 3.76E-02 |
| rs17860118  | 0.01754  | 0.08962  | 100 | 1.55E-13 |
| rs566208153 | 0.02907  | 0.0566   | 103 | 2.08E-02 |
| rs13052526  | 0.01608  | 0.04717  | 103 | 5.98E-04 |
| rs574424283 | 0.4208   | 0.3491   | 83  | 3.75E-02 |
| rs2248420   | 0.4227   | 0.3443   | 83  | 2.30E-02 |
| rs189110596 | 0.002273 | 0.01415  | 105 | 9.81E-04 |
| rs7509997   | 0.02452  | 0.0566   | 103 | 3.63E-03 |
| rs576036480 | 0.000325 | 0.004717 | 106 | 3.75E-03 |
| rs17860142  | 0.4229   | 0.3443   | 83  | 2.28E-02 |
| rs8130779   | 0.02631  | 0.0566   | 103 | 7.79E-03 |
| rs9974669   | 0.02631  | 0.0566   | 103 | 7.79E-03 |
| rs570824030 | 0.02663  | 0.0566   | 103 | 8.85E-03 |
| rs3153      | 0.4227   | 0.3443   | 83  | 2.30E-02 |
| rs1187      | 0.000487 | 0.004717 | 106 | 1.56E-02 |
| rs12482014  | 0.4229   | 0.3443   | 83  | 2.28E-02 |
| rs17860160  | 0.01608  | 0.04717  | 103 | 5.98E-04 |
| rs12482193  | 0.4285   | 0.3491   | 83  | 2.14E-02 |
| rs17860165  | 0.4229   | 0.3443   | 83  | 2.28E-02 |
| rs117489085 | 0.000325 | 0.004717 | 106 | 3.75E-03 |
| rs545411453 | 0.000325 | 0.004717 | 106 | 3.75E-03 |
| rs8128785   | 0.03215  | 0.0566   | 103 | 5.00E-02 |
| rs2229207   | 0.01803  | 0.06132  | 105 | 7.25E-06 |
| rs1051393   | 0.4329   | 0.316    | 88  | 7.22E-04 |
| rs62226154  | 0.02436  | 0.04717  | 105 | 3.69E-02 |
| rs62226157  | 0.4112   | 0.3396   | 89  | 3.72E-02 |

|             |          |          |     |          |
|-------------|----------|----------|-----|----------|
| rs144683777 | 0.000812 | 0.01887  | 104 | 5.91E-12 |
| rs10211925  | 0.0229   | 0.04717  | 105 | 2.24E-02 |
| rs17860183  | 0.1669   | 0.04245  | 104 | 1.38E-06 |
| rs2834159   | 0.02079  | 0.04245  | 105 | 3.25E-02 |
| rs12053666  | 0.4104   | 0.2925   | 88  | 5.89E-04 |
| rs2834160   | 0.01689  | 0.04245  | 105 | 5.56E-03 |
| rs2834162   | 0.01786  | 0.04245  | 105 | 9.32E-03 |
| rs17860211  | 0.01786  | 0.04245  | 105 | 9.32E-03 |
| rs2073362   | 0.01689  | 0.06132  | 105 | 2.17E-06 |
| rs17860220  | 0.01673  | 0.06132  | 105 | 1.80E-06 |
| rs147496374 | 0.00341  | 0.02358  | 106 | 5.90E-06 |
| rs4817555   | 0.04027  | 0.1226   | 102 | 6.17E-09 |
| rs59738559  | 0.04108  | 0.1226   | 102 | 1.16E-08 |
| rs2834166   | 0.3357   | 0.2547   | 95  | 1.39E-02 |
| rs11911133  | 0.4732   | 0.3774   | 82  | 5.97E-03 |
| rs181597872 | 0.000325 | 0.004717 | 106 | 3.75E-03 |
| rs2300371   | 0.4048   | 0.2925   | 88  | 1.03E-03 |
| rs1058961   | 0.2408   | 0.4481   | 84  | 6.24E-12 |
| rs35624553  | 0.03638  | 0.009434 | 106 | 3.71E-02 |
| rs139540257 | 0.007145 | 0.02358  | 105 | 7.07E-03 |
| rs2064061   | 0.3459   | 0.5189   | 75  | 2.15E-07 |
| rs67959919  | 0.03638  | 0.009434 | 106 | 3.71E-02 |
| rs148112944 | 0        | 0.00472  | 106 | 7.05E-08 |
| rs11385942  | 0.03832  | 0.009434 | 106 | 2.92E-02 |
| rs11130077  | 0.2311   | 0.3019   | 89  | 1.66E-02 |
| rs6796097   | 0.001299 | 0.009434 | 106 | 3.27E-03 |
| rs190577088 | 0.000487 | 0.004717 | 106 | 1.56E-02 |
| rs35508621  | 0.03459  | 0.004717 | 106 | 1.76E-02 |
| rs758389    | 0.000974 | 0.009434 | 106 | 6.27E-04 |
| rs34288077  | 0.03443  | 0.004717 | 106 | 1.80E-02 |
| rs141146648 | 0.0151   | 0.0566   | 103 | 3.07E-06 |
| rs150719194 | 0.000162 | 0.004717 | 106 | 2.33E-04 |
| rs35081325  | 0.03443  | 0.009434 | 106 | 4.71E-02 |
| rs35731912  | 0.03459  | 0.009434 | 106 | 4.61E-02 |
| rs17078371  | 0.001462 | 0.009434 | 106 | 5.98E-03 |
| rs112101762 | 0.001137 | 0.009434 | 106 | 1.57E-03 |
| rs113181700 | 0.001137 | 0.009434 | 106 | 1.57E-03 |
| rs4683146   | 0.3344   | 0.434    | 83  | 2.57E-03 |
| rs34326463  | 0.03426  | 0.004717 | 106 | 1.84E-02 |
| rs73064425  | 0.03475  | 0.009434 | 106 | 4.52E-02 |
| rs138727962 | 0.000162 | 0.004717 | 106 | 2.33E-04 |
| rs184214751 | 0.000974 | 0.009434 | 106 | 6.27E-04 |
| rs71325089  | 0.02907  | 0.004717 | 106 | 3.54E-02 |
| rs61185149  | 0.008931 | 0.02358  | 106 | 2.99E-02 |
| rs13081482  | 0.03491  | 0.009434 | 106 | 4.43E-02 |
| rs75826707  | 0.003248 | 0.01415  | 105 | 9.26E-03 |

|             |          |          |     |          |
|-------------|----------|----------|-----|----------|
| rs9871972   | 0.3407   | 0.5      | 73  | 1.63E-06 |
| rs140227473 | 0.001624 | 0.009434 | 106 | 9.92E-03 |
| rs75507082  | 0.02907  | 0        | 106 | 1.18E-02 |
| rs79657519  | 0.001624 | 0.009434 | 106 | 9.92E-03 |
| rs148060386 | 0.000162 | 0.004717 | 106 | 2.33E-04 |
| rs2191031   | 0.1161   | 0.0566   | 105 | 7.38E-03 |
| rs28607988  | 0.04498  | 0.01415  | 106 | 3.13E-02 |
| rs77009309  | 0.02972  | 0.1132   | 100 | 1.58E-11 |
| rs12639224  | 0.138    | 0.2075   | 95  | 4.17E-03 |
| rs12639252  | 0.000487 | 0.004717 | 106 | 1.56E-02 |
| rs2373086   | 0.02842  | 0.1226   | 99  | 1.20E-14 |
| rs112212287 | 0.01624  | 0.06132  | 103 | 1.01E-06 |
| rs7614687   | 0.01072  | 0.0566   | 104 | 2.33E-09 |
| rs57319220  | 0.0544   | 0.02358  | 106 | 4.97E-02 |
| rs34518147  | 0.04125  | 0.01415  | 106 | 4.87E-02 |
| rs9852270   | 0.2621   | 0.4528   | 77  | 7.20E-10 |
| rs560506883 | 0.000162 | 0.004717 | 106 | 2.33E-04 |
| rs77000397  | 0        | 0.00472  | 106 | 7.05E-08 |
| rs114742054 | 0        | 0.00472  | 106 | 7.05E-08 |
| rs12633699  | 0.05505  | 0.01415  | 106 | 9.39E-03 |
| rs34847985  | 0.2131   | 0.3726   | 86  | 3.20E-08 |
| rs34549672  | 0.2811   | 0.4434   | 79  | 2.76E-07 |
| rs75442536  | 0.02273  | 0.0566   | 103 | 1.49E-03 |
| rs59451221  | 0.06041  | 0.1745   | 95  | 2.65E-11 |
| rs9836836   | 0.1341   | 0.0566   | 106 | 1.02E-03 |
| rs35280891  | 0.04157  | 0.009434 | 106 | 1.96E-02 |
| rs181980885 | 0.001624 | 0.01415  | 106 | 7.07E-05 |
| rs186530132 | 0.001624 | 0.01415  | 106 | 7.07E-05 |
| rs112707117 | 0.001624 | 0.01415  | 106 | 7.07E-05 |
| rs34068335  | 0.04206  | 0.009434 | 106 | 1.85E-02 |
| rs558702333 | 0.00065  | 0.004717 | 106 | 3.76E-02 |
| rs35334665  | 0.04726  | 0.009434 | 106 | 9.75E-03 |
| rs115932896 | 0.001299 | 0.01415  | 106 | 9.37E-06 |
| rs71327009  | 0.04726  | 0.009434 | 106 | 9.75E-03 |
| rs189659509 | 0.001299 | 0.009434 | 106 | 3.27E-03 |
| rs35161099  | 0.04726  | 0.009434 | 106 | 9.75E-03 |
| rs12054287  | 0.1323   | 0.05189  | 105 | 6.06E-04 |
| rs60080146  | 0.0177   | 0.03774  | 106 | 3.27E-02 |
| rs59676542  | 0.01819  | 0.03774  | 106 | 3.96E-02 |
| rs58035200  | 0.1958   | 0.1085   | 105 | 1.53E-03 |
| rs7623460   | 0.2658   | 0.1934   | 102 | 1.86E-02 |
| rs71327010  | 0.04726  | 0.009434 | 106 | 9.75E-03 |
| rs7623476   | 0.1957   | 0.1085   | 105 | 1.56E-03 |
| rs7956880   | 0.1728   | 0.08962  | 104 | 1.53E-03 |
| rs10744785  | 0.2512   | 0.1557   | 101 | 1.54E-03 |
| rs4766662   | 0.2407   | 0.1415   | 100 | 8.49E-04 |

|                   |              |              |            |                 |
|-------------------|--------------|--------------|------------|-----------------|
| rs2240190         | 0.03491      | 0.1274       | 98         | 4.43E-12        |
| rs34137742        | 0.07616      | 0.1226       | 103        | 1.29E-02        |
| rs45542343        | 0.03215      | 0.1038       | 102        | 1.97E-08        |
| rs75344264        | 0.1082       | 0.184        | 105        | 5.41E-04        |
| rs2057778         | 0.1772       | 0.1179       | 105        | 2.57E-02        |
| rs2285934         | 0.2459       | 0.1509       | 103        | 1.53E-03        |
| rs4767023         | 0.2621       | 0.1604       | 102        | 8.83E-04        |
| rs45495393        | 0.07567      | 0.1274       | 101        | 5.62E-03        |
| rs56006713        | 0.000974     | 0.009434     | 106        | 6.27E-04        |
| rs12423440        | 0.0492       | 0.08491      | 103        | 1.95E-02        |
| <b>rs10774671</b> | <b>0.275</b> | <b>0.184</b> | <b>101</b> | <b>3.48E-03</b> |
| rs1131476         | 0.1806       | 0.1132       | 105        | 1.18E-02        |
| <b>rs2660</b>     | <b>0.181</b> | <b>0.11</b>  | <b>105</b> | <b>7.00E-03</b> |
| rs7135577         | 0.1806       | 0.1226       | 105        | 3.04E-02        |
| rs4767024         | 0.1801       | 0.1226       | 105        | 3.16E-02        |
| rs4767025         | 0.1801       | 0.1226       | 105        | 3.16E-02        |
| rs4767026         | 0.1807       | 0.1226       | 105        | 3.00E-02        |
| rs4767027         | 0.1801       | 0.1226       | 105        | 3.16E-02        |
| rs4767028         | 0.1806       | 0.1226       | 105        | 3.04E-02        |
| rs4767029         | 0.1801       | 0.1226       | 105        | 3.16E-02        |
| rs75628555        | 0.04758      | 0.08491      | 103        | 1.32E-02        |
| rs4767030         | 0.1806       | 0.1226       | 105        | 3.04E-02        |
| rs10850092        | 0.1801       | 0.1226       | 105        | 3.16E-02        |
| rs6489864         | 0.1801       | 0.1226       | 105        | 3.16E-02        |
| rs6489865         | 0.1801       | 0.1226       | 105        | 3.16E-02        |
| rs10850093        | 0.1801       | 0.1226       | 105        | 3.16E-02        |
| rs10850094        | 0.1801       | 0.1226       | 105        | 3.16E-02        |
| rs10850095        | 0.1801       | 0.1226       | 105        | 3.16E-02        |
| rs10774672        | 0.1807       | 0.1226       | 105        | 3.00E-02        |
| rs10850096        | 0.1801       | 0.1226       | 105        | 3.16E-02        |
| rs10850097        | 0.1981       | 0.1415       | 104        | 4.13E-02        |
| rs10774673        | 0.1801       | 0.1226       | 105        | 3.16E-02        |
| rs10774674        | 0.1801       | 0.1226       | 105        | 3.16E-02        |
| rs3803057         | 0.1312       | 0.06132      | 105        | 2.83E-03        |
| rs1298962         | 0.1702       | 0.09906      | 105        | 6.43E-03        |
| rs1298301         | 0.1632       | 0.2453       | 100        | 1.59E-03        |
| rs1293774         | 0.1702       | 0.09906      | 105        | 6.43E-03        |
| rs117666908       | 0.03361      | 0.06604      | 103        | 1.12E-02        |
| rs1293773         | 0.1629       | 0.2406       | 101        | 2.76E-03        |
| rs1293772         | 0.1819       | 0.08019      | 105        | 1.44E-04        |
| rs531734809       | 0            | 0.00472      | 106        | 7.05E-08        |
| rs1293771         | 0.1819       | 0.08019      | 105        | 1.44E-04        |
| rs1293770         | 0.163        | 0.2358       | 101        | 5.03E-03        |
| rs12301619        | 0.003735     | 0.01415      | 105        | 1.93E-02        |
| rs1293768         | 0.1798       | 0.08019      | 105        | 1.84E-04        |

|             |          |          |     |          |
|-------------|----------|----------|-----|----------|
| rs150169230 | 0.000162 | 0.004717 | 106 | 2.33E-04 |
| rs1293767   | 0.1259   | 0.06132  | 105 | 5.02E-03 |
| rs1293766   | 0.1575   | 0.2311   | 100 | 4.04E-03 |
| rs1293765   | 0.1645   | 0.07547  | 105 | 5.34E-04 |
| rs1293764   | 0.1639   | 0.07547  | 105 | 5.75E-04 |
| rs1293763   | 0.1523   | 0.2217   | 100 | 6.02E-03 |
| rs11066464  | 0.2085   | 0.2736   | 90  | 2.23E-02 |
| rs757402    | 0.1366   | 0.0566   | 105 | 7.75E-04 |
| rs200629605 | 0.02744  | 0.06132  | 103 | 3.60E-03 |
| rs7975318   | 0.1682   | 0.2311   | 94  | 1.66E-02 |
| rs757401    | 0.1366   | 0.0566   | 105 | 7.75E-04 |
| rs557969944 | 0        | 0.00472  | 106 | 7.05E-08 |
| rs5800979   | 0.3746   | 0.5047   | 70  | 1.24E-04 |
| rs34886194  | 0.2075   | 0.2689   | 90  | 3.10E-02 |
| rs1293762   | 0.1845   | 0.08962  | 102 | 4.24E-04 |
| rs1293760   | 0.1846   | 0.08962  | 102 | 4.17E-04 |
| rs1293759   | 0.1177   | 0.04245  | 105 | 7.37E-04 |
| rs1293758   | 0.2949   | 0.1038   | 102 | 1.55E-09 |
| rs1298961   | 0.3303   | 0.1179   | 102 | 8.00E-11 |
| rs1635142   | 0.1189   | 0.04245  | 105 | 6.45E-04 |
| rs1293757   | 0.1189   | 0.04245  | 105 | 6.45E-04 |
| rs1293756   | 0.1189   | 0.04245  | 105 | 6.45E-04 |
| rs1293754   | 0.1192   | 0.04245  | 105 | 6.20E-04 |
| rs1293753   | 0.1184   | 0.04245  | 105 | 6.83E-04 |
| rs1293752   | 0.1315   | 0.04717  | 105 | 3.11E-04 |
| rs1293751   | 0.1315   | 0.04717  | 105 | 3.11E-04 |
| rs2525848   | 0.1315   | 0.04717  | 105 | 3.11E-04 |
| rs1296061   | 0.1315   | 0.04717  | 105 | 3.11E-04 |
| rs2072137   | 0.4147   | 0.6038   | 61  | 4.23E-08 |
| rs1293749   | 0.134    | 0.05189  | 105 | 5.01E-04 |
| rs2003480   | 0.4367   | 0.283    | 96  | 8.95E-06 |
| rs1293748   | 0.134    | 0.05189  | 105 | 5.01E-04 |
| rs2240185   | 0.4834   | 0.6698   | 54  | 9.43E-08 |
| rs929291    | 0.1497   | 0.07547  | 104 | 2.70E-03 |
| rs1293747   | 0.2986   | 0.2217   | 99  | 1.58E-02 |
| rs1293746   | 0.285    | 0.2075   | 101 | 1.38E-02 |
| rs16942430  | 0.05797  | 0.01887  | 106 | 1.55E-02 |
| rs1293745   | 0.2858   | 0.2028   | 101 | 8.37E-03 |
| rs1293744   | 0.2858   | 0.2028   | 101 | 8.37E-03 |
| rs1293743   | 0.1613   | 0.06604  | 105 | 1.87E-04 |
| rs15895     | 0.1624   | 0.06604  | 105 | 1.63E-04 |
| rs574059077 | 0        | 0.00472  | 106 | 7.05E-08 |
| rs13311     | 0.4721   | 0.684    | 52  | 1.26E-09 |
| rs1058480   | 0.1626   | 0.06604  | 105 | 1.60E-04 |
| rs3815178   | 0.1884   | 0.1226   | 104 | 1.56E-02 |
| rs1859331   | 0.2756   | 0.1462   | 103 | 3.12E-05 |

|                   |                 |          |     |          |
|-------------------|-----------------|----------|-----|----------|
| <b>rs1859330</b>  | 0.2762          | 0.1462   | 103 | 2.88E-05 |
| rs1859329         | 0.1884          | 0.1226   | 104 | 1.56E-02 |
| rs7299132         | 0.1884          | 0.1226   | 104 | 1.56E-02 |
| rs6489879         | 0.1884          | 0.1226   | 104 | 1.56E-02 |
| rs4238033         | 0.1884          | 0.1226   | 104 | 1.56E-02 |
| rs4767041         | 0.1954          | 0.1321   | 104 | 2.18E-02 |
| <b>rs10850102</b> | 0.1177          | 0.2642   | 98  | 1.65E-10 |
| rs7955267         | 0.1954          | 0.1321   | 104 | 2.18E-02 |
| rs7311182         | 0.188           | 0.1226   | 104 | 1.61E-02 |
| rs73433165        | <b>0.000162</b> | 0.004717 | 106 | 2.33E-04 |
| rs10735079        | 0.195           | 0.1274   | 104 | 1.41E-02 |
| rs6489880         | 0.1884          | 0.1226   | 104 | 1.56E-02 |
| rs7980275         | 0.1949          | 0.1321   | 104 | 2.27E-02 |
| rs7977345         | 0.1954          | 0.1321   | 104 | 2.18E-02 |
| rs6489881         | 0.1954          | 0.1321   | 104 | 2.18E-02 |
| rs6489882         | 0.1884          | 0.1226   | 104 | 1.56E-02 |
| rs7131998         | 0.1853          | 0.1274   | 104 | 3.21E-02 |
| rs2269899         | 0.1924          | 0.1368   | 104 | 4.25E-02 |
| rs11066456        | 0.1452          | 0.2075   | 93  | 1.17E-02 |
| rs12427406        | 0.126           | 0.1887   | 95  | 7.27E-03 |
| rs10850104        | 0.3358          | 0.4292   | 83  | 4.72E-03 |
| rs11066457        | 0.3688          | 0.4528   | 79  | 1.28E-02 |
| rs34647135        | 0.3358          | 0.4292   | 83  | 4.72E-03 |
| rs7965570         | 0.1332          | 0.2123   | 94  | 9.47E-04 |
| rs1974518         | 0.4003          | 0.4764   | 77  | 2.63E-02 |
| rs71465868        | 0.0328          | 0        | 106 | 7.36E-03 |
| rs12824584        | <b>0.00065</b>  | 0.004717 | 106 | 3.76E-02 |
| rs146042277       | <b>0.000487</b> | 0.004717 | 106 | 1.56E-02 |
| rs10850105        | 0.1475          | 0.08962  | 104 | 1.89E-02 |
| rs7310667         | 0.1665          | 0.1132   | 104 | 3.99E-02 |
| rs4767042         | 0.4003          | 0.4764   | 77  | 2.63E-02 |
| rs78069989        | <b>0.00341</b>  | 0.01887  | 106 | 4.01E-04 |
| rs78220999        | 0.1468          | 0.08962  | 104 | 2.00E-02 |
| rs4435062         | 0.3709          | 0.4481   | 82  | 2.23E-02 |
| rs150390228       | 0.1468          | 0.08962  | 104 | 2.00E-02 |
| rs10744789        | 0.1468          | 0.08962  | 104 | 2.00E-02 |
| rs140303054       | <b>0.000487</b> | 0.004717 | 106 | 1.56E-02 |
| rs57771566        | <b>0.002923</b> | 0.01415  | 106 | 5.05E-03 |
| rs138971703       | <b>0.002436</b> | 0.01415  | 106 | 1.58E-03 |
| rs4238034         | 0.147           | 0.08962  | 104 | 1.98E-02 |
| rs4766677         | 0.4021          | 0.4764   | 77  | 3.01E-02 |
| rs4766678         | 0.4029          | 0.4858   | 77  | 1.56E-02 |
| rs58603713        | <b>0.002923</b> | 0.01415  | 106 | 5.05E-03 |
| rs2158393         | 0.3707          | 0.4481   | 82  | 2.20E-02 |
| rs2072136         | 0.3704          | 0.4481   | 82  | 2.14E-02 |
| rs2072135         | 0.1466          | 0.2028   | 95  | 2.37E-02 |
| rs60439830        | <b>0.00341</b>  | 0.01887  | 106 | 4.01E-04 |



|             |          |          |     |          |
|-------------|----------|----------|-----|----------|
| rs55688670  | 0.03556  | 0.07075  | 103 | 7.40E-03 |
| rs45607836  | 0.03556  | 0.07075  | 103 | 7.40E-03 |
| rs4767044   | 0.1174   | 0.06132  | 104 | 1.20E-02 |
| rs2240189   | 0.1565   | 0.2123   | 96  | 2.89E-02 |
| rs1557866   | 0.1172   | 0.06132  | 104 | 1.22E-02 |
| rs45489899  | 0.00341  | 0.01887  | 106 | 4.01E-04 |
| rs3937434   | 0.1174   | 0.06132  | 104 | 1.20E-02 |
| rs2016831   | 0.1174   | 0.06132  | 104 | 1.20E-02 |
| rs11837165  | 0.000325 | 0.004717 | 106 | 3.75E-03 |
| rs757405    | 0.1179   | 0.0566   | 104 | 6.11E-03 |
| rs73422036  | 0.003248 | 0.01887  | 106 | 2.62E-04 |
| rs45620632  | 0.001624 | 0.0283   | 106 | 2.35E-14 |
| rs11837367  | 0.003248 | 0.01887  | 106 | 2.62E-04 |
| rs2010604   | 0.1387   | 0.08491  | 104 | 2.51E-02 |
| rs739903    | 0.1772   | 0.2358   | 95  | 2.85E-02 |
| rs2072133   | 0.195    | 0.2594   | 93  | 2.05E-02 |
| rs4767045   | 0.1181   | 0.05189  | 104 | 3.08E-03 |
| rs45583340  | 0.000162 | 0.004717 | 106 | 2.33E-04 |
| rs75755877  | 0.002923 | 0.01415  | 106 | 5.05E-03 |
| rs10744791  | 0.1181   | 0.05189  | 104 | 3.08E-03 |
| rs73422042  | 0.002923 | 0.01415  | 106 | 5.05E-03 |
| rs7023      | 0.1772   | 0.2358   | 95  | 2.85E-02 |
| rs2251109   | 0.2369   | 0.3538   | 84  | 9.15E-05 |
| rs116082988 | 0        | 0.00472  | 106 | 7.05E-08 |
| rs17078308  | 0.004385 | 0.01887  | 106 | 2.89E-03 |
| rs144151884 | 0        | 0.00472  | 106 | 7.05E-08 |
| rs116590098 | 0        | 0.00472  | 106 | 7.05E-08 |
| rs2531750   | 0.2363   | 0.1509   | 104 | 3.88E-03 |
| rs7621856   | 0.4756   | 0.3821   | 87  | 7.30E-03 |
| rs2286489   | 0.448    | 0.6085   | 60  | 3.95E-06 |
| rs113497906 | 0.000162 | 0.004717 | 106 | 2.33E-04 |
| rs6770261   | 0.2834   | 0.3585   | 85  | 1.73E-02 |
| rs7634267   | 0.02079  | 0.08019  | 104 | 1.19E-08 |
| rs9857669   | 0.1639   | 0.2264   | 92  | 1.61E-02 |
| rs7641997   | 0.1655   | 0.1132   | 102 | 4.32E-02 |
| rs575208313 | 0.2441   | 0.316    | 89  | 1.68E-02 |
| rs143341618 | 0.000162 | 0.004717 | 106 | 2.33E-04 |
| rs567829326 | 0        | 0.00472  | 106 | 7.05E-08 |
| rs62242259  | 0.1807   | 0.09434  | 102 | 1.22E-03 |
| rs9867918   | 0.1622   | 0.217    | 93  | 3.43E-02 |
| rs186253736 | 0.000162 | 0.004717 | 106 | 2.33E-04 |
| rs74850924  | 0.001299 | 0.01415  | 106 | 9.37E-06 |
| rs369845989 | 0.00065  | 0.004717 | 106 | 3.76E-02 |
| rs4327428   | 0.1468   | 0.2358   | 90  | 3.54E-04 |
| rs2108917   | 0.2746   | 0.5142   | 74  | 2.61E-14 |
| rs720626    | 0.01932  | 0.04717  | 104 | 4.66E-03 |

|             |          |          |     |          |
|-------------|----------|----------|-----|----------|
| rs6768156   | 0.2813   | 0.5047   | 76  | 1.67E-12 |
| rs189427751 | 0.000162 | 0.004717 | 106 | 2.33E-04 |
| rs758388    | 0.01965  | 0.0566   | 103 | 2.16E-04 |
| rs2077017   | 0.01965  | 0.06132  | 103 | 3.22E-05 |
| rs9818982   | 0.1504   | 0.2075   | 93  | 2.27E-02 |
| rs17279437  | 0.05196  | 0.1226   | 95  | 8.03E-06 |
| rs1468541   | 0.02371  | 0.09906  | 102 | 1.47E-11 |
| rs565220072 | 0.000162 | 0.004717 | 106 | 2.33E-04 |
| rs13314717  | 0.003735 | 0.0283   | 106 | 1.75E-07 |
| rs17078335  | 0.000812 | 0.009434 | 106 | 1.95E-04 |
| rs57133084  | 0.004547 | 0.01415  | 106 | 4.82E-02 |
| rs2742396   | 0.4449   | 0.2123   | 97  | 1.88E-11 |
| rs2531748   | 0.4591   | 0.2264   | 97  | 2.18E-11 |
| rs6771661   | 0.001462 | 0.009434 | 106 | 5.98E-03 |
| rs59375543  | 0.000487 | 0.004717 | 106 | 1.56E-02 |
| rs2252547   | 0.3509   | 0.5283   | 74  | 1.16E-07 |
| rs543762608 | 0.00065  | 0.004717 | 106 | 3.76E-02 |
| rs12493913  | 0.3553   | 0.25     | 98  | 1.59E-03 |
| rs576940167 | 0.00065  | 0.004717 | 106 | 3.76E-02 |
| rs17078339  | 0.3115   | 0.1981   | 101 | 4.38E-04 |
| rs34987516  | 0.3284   | 0.2075   | 101 | 2.20E-04 |
| rs142086756 | 0.000325 | 0.004717 | 106 | 3.75E-03 |
| rs184263104 | 0.000325 | 0.004717 | 106 | 3.75E-03 |
| rs2531747   | 0.1843   | 0.3349   | 92  | 3.74E-08 |
| rs9848415   | 0.302    | 0.1887   | 102 | 3.89E-04 |
| rs57126329  | 0.2267   | 0.09906  | 105 | 1.12E-05 |
| rs2159272   | 0.2808   | 0.467    | 78  | 3.79E-09 |
| rs7644870   | 0.3404   | 0.2075   | 101 | 5.68E-05 |
| rs1860263   | 0.3454   | 0.2123   | 101 | 5.80E-05 |
| rs545193808 | 0        | 0.00472  | 106 | 7.05E-08 |
| rs13064991  | 0.2272   | 0.1415   | 101 | 3.28E-03 |
| rs28437706  | 0.06382  | 0.1038   | 101 | 2.05E-02 |
| rs9852457   | 0.06382  | 0.1038   | 101 | 2.05E-02 |
| rs182605899 | 0.000325 | 0.004717 | 106 | 3.75E-03 |
| rs59776512  | 0.06285  | 0.1179   | 100 | 1.35E-03 |
| rs73062389  | 0.004385 | 0.01415  | 106 | 4.11E-02 |
| rs7615978   | 0.06479  | 0.1179   | 100 | 2.28E-03 |
| rs543563855 | 0        | 0.00472  | 106 | 7.05E-08 |
| rs7618553   | 0.06479  | 0.1038   | 101 | 2.47E-02 |
| rs147310206 | 0.000325 | 0.004717 | 106 | 3.75E-03 |
| rs188376831 | 0        | 0.00472  | 106 | 7.05E-08 |
| rs2271616   | 0.01153  | 0.0283   | 106 | 2.80E-02 |
| rs11085726  | 0.000325 | 0.004717 | 106 | 3.75E-03 |
| rs2304256   | 0.2061   | 0.316    | 85  | 1.10E-04 |
| rs12720270  | 0.1916   | 0.283    | 89  | 9.51E-04 |
| rs34725611  | 0.2061   | 0.3019   | 87  | 7.46E-04 |

|             |          |          |     |          |
|-------------|----------|----------|-----|----------|
| rs569826524 | 0.4432   | 0.6038   | 59  | 3.78E-06 |
| rs12610298  | 0.1892   | 0.25     | 93  | 2.68E-02 |
| rs62130729  | 0.189    | 0.2594   | 91  | 1.04E-02 |
| rs280499    | 0.07584  | 0.1179   | 99  | 2.40E-02 |
| rs280500    | 0.03832  | 0.1132   | 99  | 6.03E-08 |
| rs12720218  | 0.02793  | 0.08962  | 99  | 2.24E-07 |
| rs280501    | 0.04206  | 0.1132   | 99  | 7.68E-07 |
| rs71327006  | 0.04726  | 0.009434 | 106 | 9.75E-03 |
| rs547178387 | 0.000487 | 0.004717 | 106 | 1.56E-02 |
| rs559851604 | 0.000487 | 0.004717 | 106 | 1.56E-02 |
| rs71327007  | 0.04726  | 0.009434 | 106 | 9.75E-03 |
